# Supplementary material for: Scintillation materials based on metal iodates by rare earth doping modifications for use in radioluminescence and X-ray imaging
Source: Royal Society of Chemistry journal article supplement (doi:10.1039/d1ce00153a), 2021-01-01
Supplement: d1ce00153a1.pdf [file d1ce00153a1.pdf]

## Supporting information

# Scintillation material based on metal iodates by rare earth doping modification with performance of radioluminescence and X-ray imaging

Weiwei Xu<sup>a,b</sup>, Hui Xu<sup>a,b</sup>, Shuaihua Wang<sup>b,\*</sup>, Xieming Xu<sup>b</sup>, Zhilin Wang<sup>b</sup>, Xianhui  
Zhang<sup>b</sup>, Shaofan Wu<sup>b,\*</sup>

<sup>a</sup> College of Chemistry, Fuzhou University, Fuzhou 350108, P. R. China

<sup>b</sup> Key Laboratory of Optoelectronic Materials Chemistry and Physics, Fujian Institute of Research  
on the Structure of Matter, Chinese Academy of Sciences, Fuzhou 350002, P. R. China

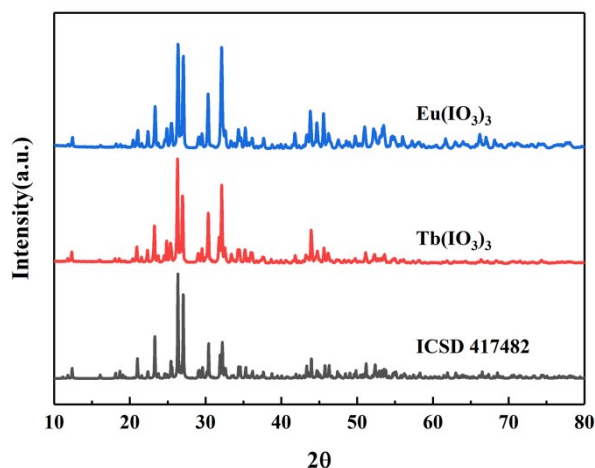

**Fig. S1** XRD patterns of  $\text{Ln}(\text{IO}_3)_3$  ( $\text{Ln} = \text{Eu}, \text{Tb}$ )

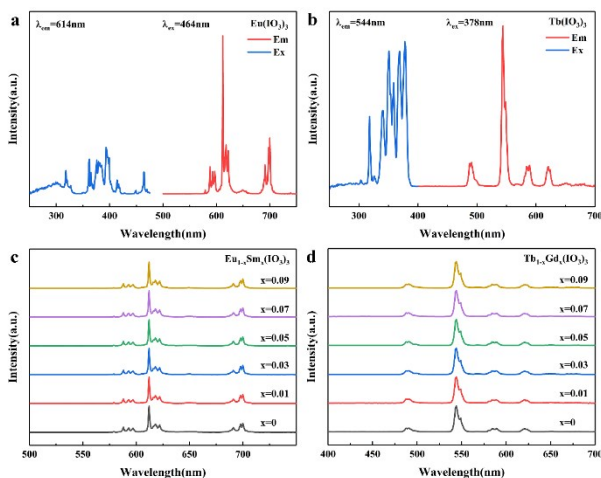

**Fig. S2** PL and PLE spectra of (a)  $\text{Eu}(\text{IO}_3)_3$  and (b)  $\text{Tb}(\text{IO}_3)_3$ . PL spectra of (c)  $x\text{Sm}^{3+}:\text{Eu}(\text{IO}_3)_3$  and (d)  $x\text{Gd}^{3+}:\text{Tb}(\text{IO}_3)_3$  ( $x = 0, 1\%, 3\%, 5\%, 7\%$ )

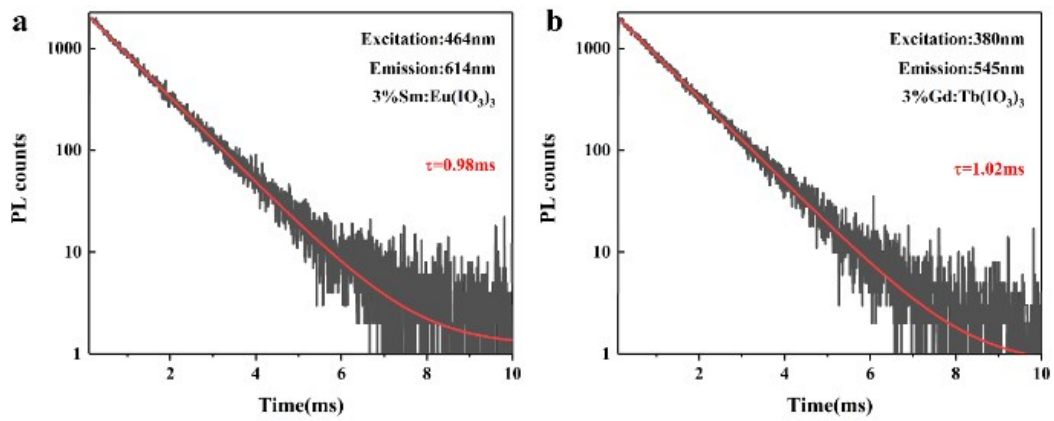

**Fig. S3** The photoluminescence decay curves of 3%Sm<sup>3+</sup>:Eu(IO<sub>3</sub>)<sub>3</sub> and (d) 3%Gd<sup>3+</sup>:Tb(IO<sub>3</sub>)<sub>3</sub>

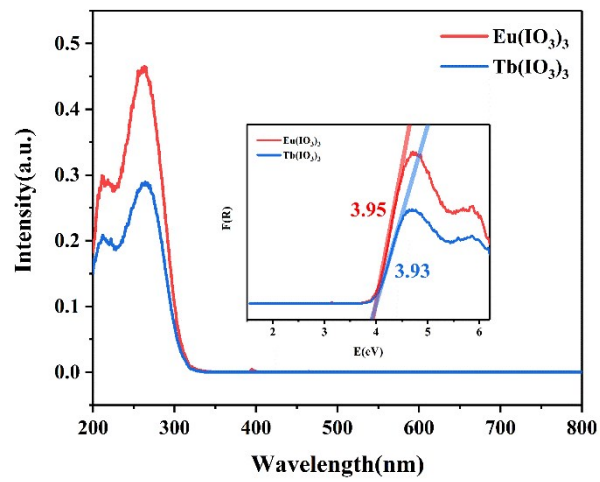

**Fig. S4** Absorption spectra and (inset) band gap of Ln(IO<sub>3</sub>)<sub>3</sub> (Ln= Eu, Tb)

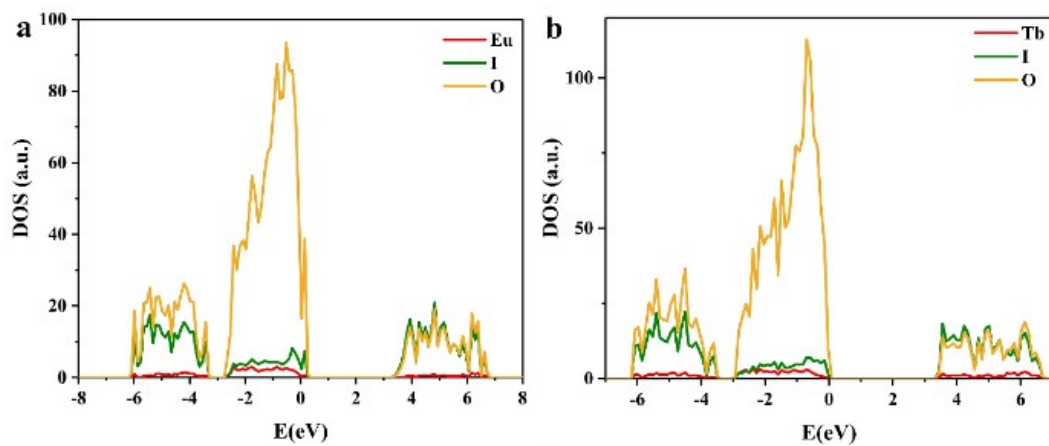

**Fig. S5** DOS of (a) Eu(IO<sub>3</sub>)<sub>3</sub> and (b) Tb(IO<sub>3</sub>)<sub>3</sub>

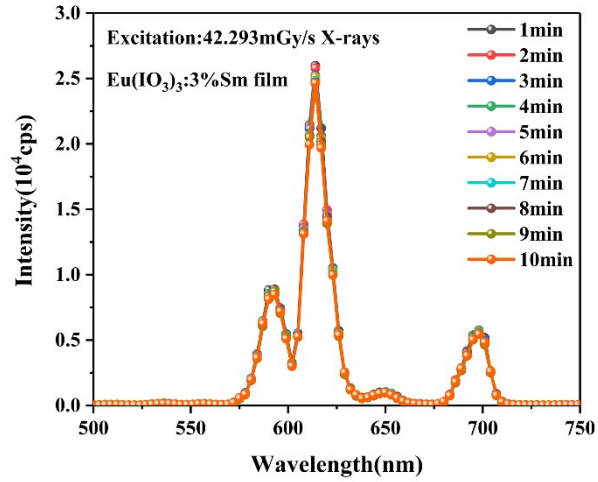

Fig. S6 RL spectra of Eu(IO<sub>3</sub>)<sub>3</sub>:3%Sm film under 10 minutes continuous irradiation

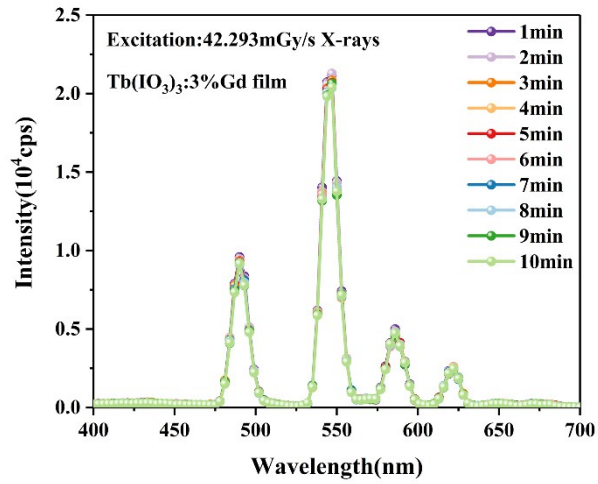

Fig. S7 RL spectra of Tb(IO<sub>3</sub>)<sub>3</sub>:3%Gd film under 10 minutes continuous irradiation

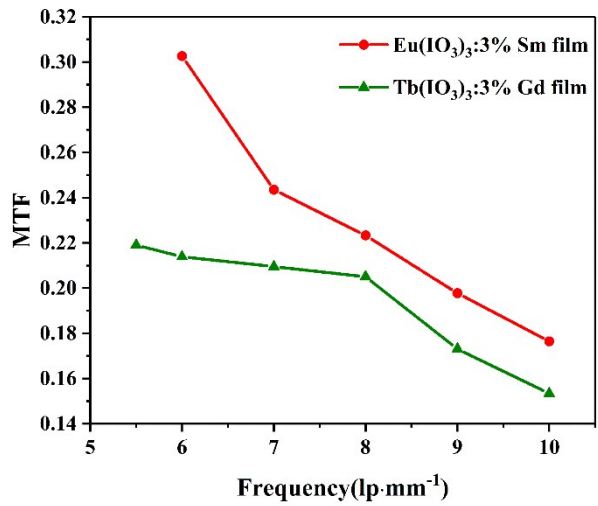

Fig. S8 MTF value of Eu(IO<sub>3</sub>)<sub>3</sub>:3%Sm and Tb(IO<sub>3</sub>)<sub>3</sub>:3%Gd films by line-pair pattern method
